# Supplementary material
Source: Springer Nature journal article supplement (https://www.springermedizin.de/resource/supplementary/13014_2010_338_MOESM1_ESM.pdf/9633398)

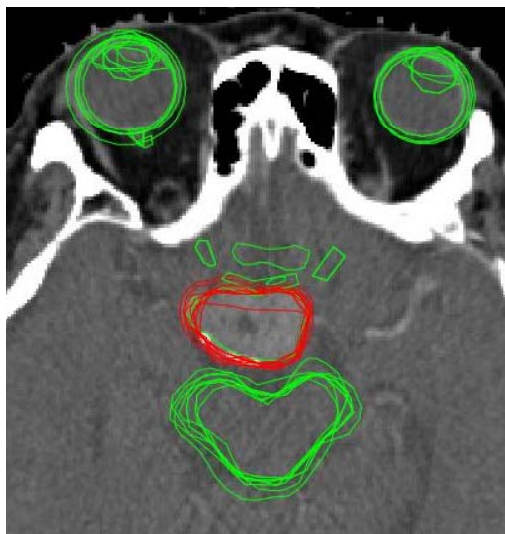

**(a)**

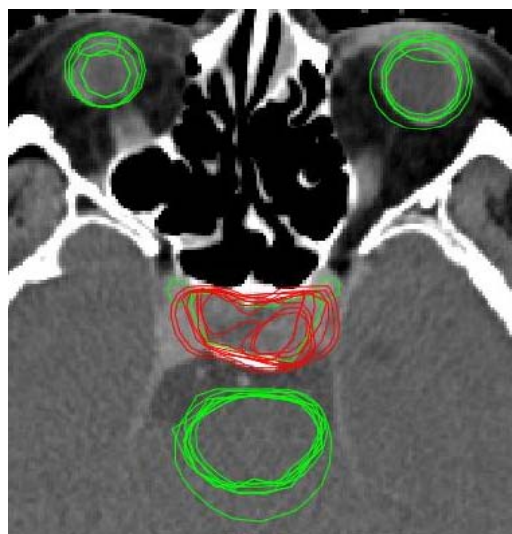

**(b)**

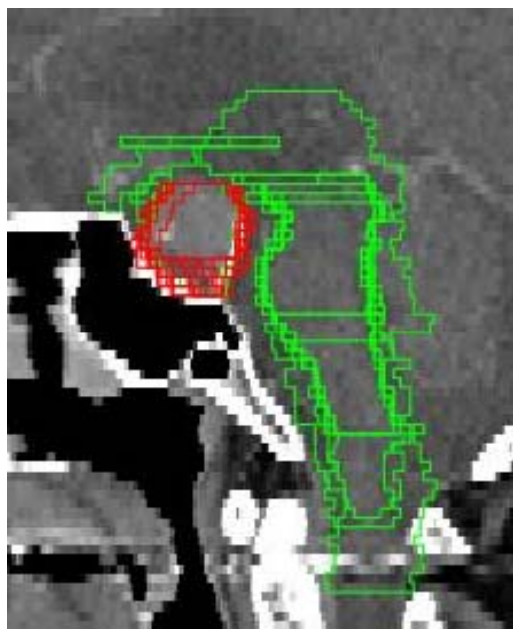

**(c)**

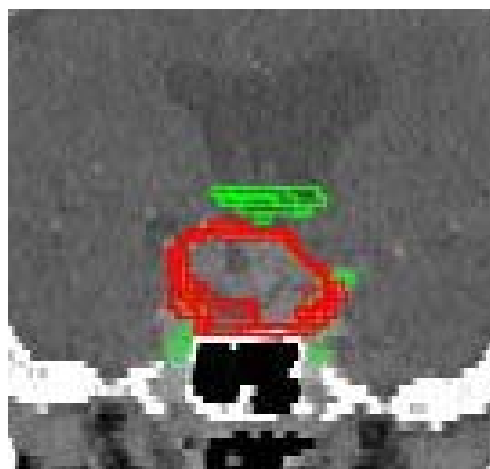

**(d)**

Supplement: MOESM1 [file 9633398]
